# Supplementary material for: Intergroup Contact and Outgroup Humanization: Is the Causal Relationship Uni- or Bidirectional?
Source: PLoS One. 2017 Jan 24;12(1):e0170554. doi: 10.1371/journal.pone.0170554 (PMC5261613; doi:10.1371/journal.pone.0170554)
Supplement: S2 Dataset — (XLSX) [file pone.0170554.s003.xlsx]

## Sheet: Study_2
ID	Condition	Condition_II	Anxiety_01	Anxiety_02	Anxiety_03	Anxiety_04	Anxiety_05	Anxiety_06	Anxiety_07	Anxiety_08	Anxiety_09	Anxiety_10	Anxiety_11	Anxiety_12	Trust_01	Trust_02	Trust_03	Trust_04	Uniquely_Hum_01	Uniquely_Hum_02	Uniquely_Hum_03	Uniquely_Hum_04	Non_Uniquely_Hum_01	Non_Uniquely_Hum_02	Non_Uniquely_Hum_03	Non_Uniquely_Hum_04	Attitude_01	Attitude_02	Attitude_03	Attitude_04	Attitude_05	Gender	Age	Anxiety	Trust	Uniquely_Human	Non_Uniquely_Human	Attitude
1	Contact	1	3	5	5	2	4	2	2	4	1	4	5	1	3	3	3	6	5	6	4	5	6	5	6	6	3	3	5	5	4	1	24	3.16667	3.75	5	5.75	4
2	Contact	1	3	6	5	3	4	2	2	4	2	5	5	2	4	4	6	6	6	4	6	6	4	4	4	3	5	6	4	5	5	2	20	3.58333	5	5.5	3.75	5
3	Contact	1	4	6	3	2	5	3	1	4	3	6	6	2	4	3	4	5	5	4	5	6	6	6	5	5	4	5	3	3	4	2	23	3.75	4	5	5.5	3.8
4	Contact	1	3	6	5	1	7	2	2	5	2	4	4	2	4	4	4	4	4	4	4	4	4	4	4	4	4	4	4	4	4	2	50	3.58333	4	4	4	4
5	Contact	1	4	5	3	6	2	4	4	2	5	4	4	6	5	5	5	4	4	4	4	5	5	5	5	5	3	5	4	5	5	1	26	4.08333	4.75	4.25	5	4.4
6	Contact	1	1	3	3	4	4	1	1	4	1	4	4	1	4	4	7	7	5	5	5	4	4	3	4	3	6	6	4	5	6	1	23	2.58333	5.5	4.75	3.5	5.4
7	Contact	1	4	6	6	4	6	3	2	6	2	7	7	5	2	2	3	6	5	6	6	6	5	5	1	4	5	3	3	3	6	2	24	4.83333	3.25	5.75	3.75	4
8	Contact	1	3	6	4	2	6	3	2	4	2	4	4	3	4	4	4	5	6	6	6	6	5	5	5	5	5	5	5	5	5	2	24	3.58333	4.25	6	5	5
9	Contact	1	2	5	3	2	3	1	1	3	1	5	3	1	4	4	7	6	4	4	6	5	6	5	6	6	6	6	4	6	3	2	29	2.5	5.25	4.75	5.75	5
10	Contact	1	2	5	4	3	4	2	1	4	1	5	4	1	6	6	5	7	4	4	4	4	5	5	4	4	5	4	5	4	5	2	22	3	6	4	4.5	4.6
11	Contact	1	2	6	4	4	6	3	3	5	2	6	7	4	4	2	4	6	3	3	3	4	6	5	5	5	3	4	3	5	4	2	26	4.33333	4	3.25	5.25	3.8
12	Contact	1	4	3	3	4	3	5	6	2	4	4	3	4	4	4	5	5	5	6	6	5	5	5	6	4	3	6	2	2	5	2	24	3.75	4.5	5.5	5	3.6
13	Contact	1	4	3	3	2	2	2	2	3	2	4	4	2	4	5	6	7	5	5	4	5	6	4	2	3	6	6	6	6	6	1	28	2.75	5.5	4.75	3.75	6
14	Contact	1	1	3	3	2	3	1	1	3	1	4	3	1	4	4	5	6	4	6	4	4	4	4	4	4	4	6	6	6	5	2	30	2.16667	4.75	4.5	4	5.4
15	Contact	1	3	6	7	1	6	4	4	6	3	6	6	3	3	3	3	4	3	5	5	5	5	6	6	6	3	4	5	5	5	2	23	4.58333	3.25	4.5	5.75	4.4
16	Contact	1	2	5	5	2	6	2	2	4	2	6	6	2	3	3	6	7	4	3	4	4	5	5	3	5	3	5	4	4	5	1	24	3.66667	4.75	3.75	4.5	4.2
17	Contact	1	1	4	5	2	4	2	1	2	1	2	4	1	5	4	6	7	4	4	4	4	6	5	4	4	4	4	5	4	4	1	28	2.41667	5.5	4	4.75	4.2
18	Contact	1	1	5	4	1	3	1	1	3	1	3	3	1	5	5	7	6	4	6	5	5	3	4	6	5	3	6	6	6	6	2	23	2.25	5.75	5	4.5	5.4
19	Contact	1	4	5	4	5	5	4	3	5	2	5	6	2	4	4	6	6	6	7	4	6	4	6	7	7	5	6	6	6	7	2	36	4.16667	5	5.75	6	6
20	Neutral	2	4	5	6	6	4	4	4	3	5	4	4	5	5	4	4	6	5	5	5	4	6	3	5	6	5	3	4	5	4	1	21	4.5	4.75	4.75	5	4.2
21	Neutral	2	2	6	4	1	7	5	4	4	4	6	2	4	2	2	4	7	2	1	3	5	5	5	6	6	2	5	6	6	7	2	23	4.08333	3.75	2.75	5.5	5.2
22	Neutral	2	6	6	4	5	6	6	6	6	2	4	5	5	4	4	6	6	5	3	3	5	6	4	5	5	3	3	2	2	4	1	25	5.08333	5	4	5	2.8
23	Neutral	2	3	4	4	4	6	2	2	6	3	7	6	4	2	1	3	4	3	4	5	4	6	6	6	7	4	4	5	5	4	2	25	4.25	2.5	4	6.25	4.4
24	Neutral	2	4	6	4	2	7	3	2	4	4	6	6	3	3	2	3	4	3	4	3	4	5	5	5	5	3	5	4	3	4	1	28	4.25	3	3.5	5	3.8
25	Neutral	2	5	4	4	5	4	4	4	4	2	4	5	4	4	4	4	5	4	4	4	4	4	4	4	4	4	4	4	4	4	2	24	4.08333	4.25	4	4	4
26	Neutral	2	3	4	4	1	2	2	2	4	2	5	5	2	5	5	6	7	4	4	3	5	5	5	5	6	4	5	6	6	5	2	24	3	5.75	4	5.25	5.2
27	Neutral	2	4	4	3	3	4	2	2	3	2	5	4	2	3	3	7	7	3	5	3	3	4	5	4	4	5	4	5	4	4	2	22	3.16667	5	3.5	4.25	4.4
28	Neutral	2	3	4	5	5	4	4	3	4	2	5	5	3	4	3	3	3	4	3	4	4	5	6	4	5	5	4	3	3	5	2	24	3.91667	3.25	3.75	5	4
29	Neutral	2	5	4	7	6	4	3	4	4	2	4	6	4	4	4	6	6	4	6	4	4	5	4	4	5	4	4	5	4	4	2	31	4.41667	5	4.5	4.5	4.2
30	Neutral	2	3	7	6	2	6	4	4	7	3	7	7	4	1	1	2	2	5	2	3	3	3	3	3	4	2	2	2	1	4	2	22	5	1.5	3.25	3.25	2.2
31	Neutral	2	2	6	6	3	6	3	3	4	2	6	6	5	3	2	2	6	3	3	3	3	5	2	4	2	3	2	3	3	4	1	25	4.33333	3.25	3	3.25	3
32	Neutral	2	1	3	3	1	2	1	1	3	1	6	5	1	2	2	6	5	3	3	4	3	6	4	7	3	3	2	3	3	2	1	23	2.33333	3.75	3.25	5	2.6
33	Neutral	2	2	5	4	4	4	2	2	4	1	4	4	2	5	4	4	5	4	4	4	4	5	4	6	5	4	3	4	4	4	2	22	3.16667	4.5	4	5	3.8
34	Neutral	2	5	5	7	6	5	4	4	5	2	7	7	6	5	5	6	6	4	5	5	4	5	5	5	5	4	4	3	3	3	2	23	5.25	5.5	4.5	5	3.4
35	Neutral	2	4	5	5	3	7	2	2	3	2	4	4	1	3	2	3	4	4	2	4	4	3	4	5	5	3	4	4	5	5	1	22	3.5	3	3.5	4.25	4.2
36	Neutral	2	3	4	3	2	3	1	1	3	1	6	5	2	4	4	7	7	5	6	5	5	3	4	5	4	4	5	6	4	4	2	22	2.83333	5.5	5.25	4	4.6
37	Neutral	2	3		5	2	5	2	2	4	1	7	6	2	4	4	4	4	1	2	2	2	6	5	4	5	4	4	3	4	5	2	25	3.54546	4	1.75	5	4
38	Neutral	2	5	4	5	2	3	4	4	5	5	6	5	4	3	3	3	3	2	3	4	3	5	6	5	6	4	4	3	3	4	1	27	4.33333	3	3	5.5	3.6
39	Neutral	2	5	4	4	5	6	4	6	5	3	5	4	5	4	4	3	3	2	2	3	3	5	5	4	6	3	3	4	4	3	1	24	4.66667	3.5	2.5	5	3.4
40	Sideways	3	4	5	5	5	3	4	4	2	2	4	4	4	3	4	4	3	4	4	4	3	5	6	5	6	3	5	4	5	5	2	23	3.83333	3.5	3.75	5.5	4.4
41	Sideways	3	6	6	5	4	5	2	4	6	2	6	6	6	3	2	3	3	5	4	5	3	6	6	6	6	4	3	4	4	4	2	22	4.83333	2.75	4.25	6	3.8
42	Sideways	3	5	6	6	5	5	3	3	6	2	6	6	3	3	3	4	4	3	5	3	4	6	6	6	5	3	3	4	5	5	2	36	4.66667	3.5	3.75	5.75	4
43	Sideways	3	5	6	2	5	7	6	6		4	7	7	5	3	3	3	4	7	3	6	4	4	4	1	2	3	3	2	2	5	2	22	5.45455	3.25	5	2.75	3
44	Sideways	3	2	4	5	2	5	2	2	4	1	6	5	2	4	4	6	6	4	6	4	5	6	6	5	5	6	4	6	6	6	2	25	3.33333	5	4.75	5.5	5.6
45	Sideways	3	4	4	5	4	5	2	2	3	1	4	5	1	4	3	5	6	4	4	5	4	2	4	4	4	5	5	7	5	5	2	22	3.33333	4.5	4.25	3.5	5.4
46	Sideways	3	4	5	6	4	5	3	3	4	2	5	6	4	3	3	4	6	3	4	4	5	5	5	4	4	4	4	5	4	4	2	23	4.25	4	4	4.5	4.2
47	Sideways	3	2	7	6	3	6	2	2	5	2	6	6	2	3	3	6	5	4	6	3	4	5	5	5	5	3	5	5	4	4	2	22	4.08333	4.25	4.25	5	4.2
48	Sideways	3	2	6	7	2	6	3	3	6	2	6	7	3	3	3	7	7	6	6	4	3	6	4	7	6	3	3	6	4	4	2	21	4.41667	5	4.75	5.75	4
49	Sideways	3	3	7	6	2	7	3	3	7	1	6	7	3	3	3	3	3	4	4	2	4	6	4	6	6	1	6	6	2	1	2	22	4.58333	3	3.5	5.5	3.2
50	Sideways	3	3	5	6	2	6	3	3	5	1	5	6	3	5	4	4	6	6	2	2	3	2	2	2	3		3	4	4	4	2	22	4	4.75	3.25	2.25	3.75
51	Sideways	3	2	4	5	3	6	2	1	5	2	6	6	2	4	4	6	6	4	3	6	5	2	3	3	3	6	6	6	6	6	2	22	3.66667	5	4.5	2.75	6
52	Sideways	3	5	7	4	5	7	5	6	4	4	6	4	5	3	3	3	4	2	3	2	2	6	6	6	6	5	1	6	5	1	2	22	5.16667	3.25	2.25	6	3.6
53	Sideways	3	4	6	6	3	7	4	4	6	4	6	6	4	3	3	3	4	4	3	4	3	5	4	4	5	4	5	5	5	5	2	22	5	3.25	3.5	4.5	4.8
54	Sideways	3	1	3	3	2	4	1	1	3	1	1	3	2	5	5	6	5	2	4	3	4	5	5	5	5	3	4	4	4	4	1	30	2.08333	5.25	3.25	5	3.8
55	Sideways	3	2	6	5	1	6	2	2	6	1	6	6	2	6	6	6	6	4	4	4	5	5	5	5	5	4	4	4	4	4	2	21	3.75	6	4.25	5	4
56	Sideways	3	7	7	6	5	6	5	5	6	4	7	7	7	1	1	1	3	5	4	5	4	6	6	6	5	4	4	4	4	4	2	28	6	1.5	4.5	5.75	4
57	Sideways	3	1	3	3	1	5	1	1	6	1	3	3	1	4	4	5	6	5	6	5	5	4	6	7	6	4	5	6	6	6	2	37	2.41667	4.75	5.25	5.75	5.4

## Sheet: LEGEND
	Legend for data from Study 2
	6 items of Anxiety and 2 items of Trust are reverse coded
	Gender	1	Male
		2	Female
