# Supplementary material for: Intergroup Contact and Outgroup Humanization: Is the Causal Relationship Uni- or Bidirectional?
Source: PLoS One. 2017 Jan 24;12(1):e0170554. doi: 10.1371/journal.pone.0170554 (PMC5261613; doi:10.1371/journal.pone.0170554)
Supplement: S3 Dataset — (XLSX) [file pone.0170554.s004.xlsx]

## Sheet: Data
ID	age	gender	Nationality	UU_Moroccans_01	UU_Moroccans_02	UU_Moroccans_03	UU_Moroccans_04	NU_Moroccans_01	NU_Moroccans_02	NU_Moroccans_03	NU_Moroccans_04	Balance_IAT	D_UMA
1	20	1	Italian	4	6	4	6	7	6	5	4	1	1.06853
2	24	0	Italian	3	5	3	3	6	6	6	5	1	0.616759
3	22	0	Italian	5	4	3	4	5	4	4	4	2	0.554656
4	23	0	Italian	6	4	3	3	6	5	4	7	1	0.920863
5	19	0	Italian	2	2	3	4	6	5	6	6	2	0.53112
6	22	0	Italian	4	3	4	4	5	5	4	3	1	0.41288
7	24	1	Italian	6	6	6	6	6	6	6	6	2	0.270025
8	25	0	Italian	3	6	5	5	6	5	6	6	1	0.194161
9	23	1	Italian	7	7	6	6	6	6	7	4	2	0.553784
10	23	1	Italian	3	5	5	5	5	5	5	5	1	1.28729
11	22	1	Italian	2	2	2	1	7	6	7	6	2	1.14064
12	19	1	Italian	4	3	5	4	4	4	5	4	1	0.510311
13	19	0	Italian	4	6	3	4	5	4	5	3	2	-0.108444
14	19	0	Italian	4	1	2	2	5	4	4	4	1	0.644454
15	19	0	Italian	3	4	4	4	5	5	5	4	2	0.525887
16	20	1	Italian	2	4	4	4	5	5	5	5	1	0.738248
17	24	1	Italian	3	4	4	3	6	5	6	6	2	0.494328
18	23	1	Italian	4	1	4	4	6	4	4	4	2	0.535408
19	21	1	Italian	3	3	3	3	3	3	3	3	1	0.284253
20	21	1	Italian	4	2	4	4	6	5	5	4	2	0.819198
21	19	0	Italian	4	3	4	4	6	6	6	5	1	0.906129
22	20	1	Italian	3	3	1	2	7	7	7	7	2	0.501882
23	26	0	Italian	7	4	6	6	7	5	5	5	1	0.61534
24	23	1	Italian	4	6	5	4	5	6	4	7	2	-0.451699
25	23	0	Italian	7	4	7	7	4	4	4	4	1	-0.093654
26	27	0	Italian	4	4	4	4	4	4	4	4	2	0.828666
27	25	1	Italian	6	6	5	6	5	5	4	6	1	0.643641
28	19	0	Italian	4	4	4	4	6	4	6	4	2	-0.098034
29	21	1	Italian	4	2	2	2	6	5	4	5	1	0.72119
30	21	0	Italian	7	2	1	2	7	2	6	2	2	0.408011
31	23	1	Italian	2	2	4	3	6	6	6	4	1	0.845943
32	27	1	Italian	2	5	3	2	6	6	6	6	2	0.043846
33	21	0	Italian	4	5	4	6	4	5	5	5	1	0.784531
34	22	0	Italian	4	4	4	4	5	5	5	5	2	0.446822
35	23	0	Italian	4	5	4	4	4	5	5	4	1	0.96889
36	23	0	Italian	6	2	6	6	6	4	6	6	2	0.168601
37	24	0	Italian	4	4	4	4	4	4	4	4	1	0.503711
38	26	0	Italian	4	5	4	4	5	4	5	5	2	0.642531
39	22	0	Italian	3	6	2	5	6	6	5	6	1	0.778683
40	31	1	Italian	1	1	1	1	7	7	1	6	2	0.621633
41	22	0	Italian	4	6	4	4	4	4	4	5	1	0.514984
42	20	0	Italian	4	5	4	4	5	5	3	3	2	0.298014
43	24	1	Italian	4	6	4	4	6	6	5	5	2	0.52806
44	20	1	Italian	7	4	7	6	5	5	4	4	1	0.795252
45	27	1	Italian	3	5	6	6	4	6	5	5	2	-0.111947

## Sheet: LEGEND
	Legend for Supplementary data
	Gender	1	Male
		0	Female
	UU_Moroccans_XX		Uniquely Human Traits Moroccans
	NU_Moroccans_XX		Non-Uniquely Human Traits Moroccans
	D_UMA		Humanity IAT
	Balance_IAT	1	Compatible Blocks First
		2	Incompatible Blocks First
